# Supplementary material for: Investigating parental care behaviour in same-sex pairing of zoo greater flamingo (Phoenicopterus roseus)
Source: PeerJ. 2018 Jul 18;6:e5227. doi: 10.7717/peerj.5227 (PMC6054785; doi:10.7717/peerj.5227)
Supplement: Supplemental Information 1 [file peerj-06-5227-s001.xlsx]

## Sheet: KUG-SRS LOCATION-POSTURE
COPPIA KUG-SRS
	Session	Near the nest	On the nest standing	On the nest sitting	Away from the nest	On the nest (standing+sitting)
A	1	391	143	457	209	600
A	2	378	0	600	222	600
A	3	0	244	956	0	1200
A	4	1100	0	0	100	0
A	5	0	238	962	0	1200
A	6	600	0	0	600	0
A	7	600	240	360	0	600
A	8	600	186	414	0	600
A	9	290	0	600	310	600
A	10	0	54	1146	0	1200
	Session	Near the nest	On the nest standing	On the nest sitting	Away from the nest	On the nest (standing+sitting)
B	1	0	144	456	600	600
B	2	600	0	600	0	600
B	3	0	0	0	1200	0
B	4	0	46	1154	0	1200
B	5	0	0	0	1200	0
B	6	0	99	1101	0	1200
B	7	0	131	469	600	600
B	8	0	0	600	600	600
B	9	0	115	485	600	600
B	10	0	0	0	1200	0
		Total (female 1 + female 2)
		Near the nest	On the nest standing	On the nest sitting	Away from the nest
		391	287	913	809
		978	0	1200	222
		0	244	956	1200
		1100	46	1154	100
		0	238	962	1200
		600	99	1101	600
		600	371	829	600
		600	186	1014	600
		290	115	1085	910
		0	54	1146	1200

## Sheet: HRY-RHH LOCATION-POSTURE
COPPIA C&D
Female	Session	Near the nest	On the nest standing	On the nest sitting	Away from the nest	On the nest (standing+sitting)
C	1	143	0	600	457	600
C	2	600	67	533	0	600
C	3	600	35	565	0	600
C	4	0	0	1200	0	1200
C	5	0	141	1059	0	1200
C	6	0	0	600	600	600
C	7	600	0	600	0	600
C	8	0	67	533	600	600
C	9	0	44	1156	0	1200
C	10	600	61	539	0	600
Female	Session	Near the nest	On the nest standing	On the nest sitting	Away from the nest	On the nest (standing+sitting)
D	1	0	60	540	600	600
D	2	84	222	378	516	600
D	3	0	0	600	600	600
D	4	0	0	0	1200	0
D	5	1074	0	0	126	0
D	6	0	0	600	600	600
D	7	600	0	600	0	600
D	8	350	0	600	250	600
D	9	0	0	0	1200	0
D	10	0	0	600	600	600
		Total (female 1 + female 2)
	Session	Near the nest	On the nest standing	On the nest sitting	Away from the nest	On the nest (standing+sitting)
	1	143	60	1140	1057	1200
	2	684	289	911	516	1200
	3	600	35	1165	600	1200
	4	0	0	1200	1200	1200
	5	1074	141	1059	126	1200
	6	0	0	1200	1200	1200
	7	1200	0	1200	0	1200
	8	350	67	1133	850	1200
	9	0	44	1156	1200	1200
	10	600	61	1139	600	1200

## Sheet: KUG-SRS BEHAV
		Near the nest							Near the nest
Female	Session	Agonistic b.	Comfort b.	Sleeping	Other			Female	Session	Agonistic b.	Comfort b.	Sleeping	Other
A	1	10	86	109	186			B	1	0	0	0	0
A	2	12	10	0	356			B	2	0	384	0	216
A	3	0	0	0	0			B	3	0	0	0	0
A	4	29	301	312	458			B	4	0	0	0	0
A	5	0	0	0	0			B	5	0	0	0	0
A	6	28	244	0	328			B	6	0	0	0	0
A	7	0	600	0	0			B	7	0	0	0	0
A	8	0	0	434	166			B	8	0	0	0	0
A	9	8	0	0	282			B	9	0	0	0	0
A	10	0	0	0	0			B	10	0	0	0	0
		Standing on the nest							Standing on the nest
Female	Session	Agonistic b.	Egg-care	Comfort b.				Female	Session	Agonistic b.	Egg-care	Comfort b.
A	1	0	127	16				B	1	3	141	0
A	2	0	0	0				B	2	0	0	0
A	3	29	180	35				B	3	0	0	0
A	4	0	0	0				B	4	0	46	0
A	5	25	193	20				B	5	0	0	0
A	6	0	0	0				B	6	4	85	10
A	7	59	181	0				B	7	0	60	71
A	8	1	176	9				B	8	0	0	0
A	9	0	0	0				B	9	14	101	0
A	10	0	49	5				B	10	0	0	0
		On the nest sitting								On the nest sitting
Female 1	Session	Agonistic b.	Incubation	Nest-building	Comfort b.	Sleeping		Female 2	Session	Agonistic b.	Incubation	Nest-building	Comfort b.	Sleeping
KUG blue	1	0	34	423	0	0		SRS green	1	10	145	301	0	0
KUG blue	2	0	0	600	0	0		SRS green	2	125	79	396	0	0
KUG blue	3	98	290	568	0	0		SRS green	3	0	0	0	0	0
KUG blue	4	0	0	0	0	0		SRS green	4	0	784	72	0	298
KUG blue	5	99	101	762	0	0		SRS green	5	0	0	0	0	0
KUG blue	6	0	0	0	0	0		SRS green	6	171	129	706	0	95
KUG blue	7	32	0	328	0	0		SRS green	7	0	2	0	0	467
KUG blue	8	59	107	248	0	0		SRS green	8	1	599	0	0	0
KUG blue	9	342	184	74	0	0		SRS green	9	45	221	182	37	0
KUG blue	10	101	18	1027	0	0		SRS green	10	0	0	0	0	0

## Sheet: HRY-RHH BEHAV
		Near the nest							Near the nest
Female	Session	Agonistic b.	Comfort b.	Sleeping	Other		Female	Session	Agonistic b.	Comfort b.	Sleeping	Other
C	1	8	81	0	54		D	1	0	0	0	0
C	2	0	600	0	0		D	2	38	0	0	46
C	3	40	3	0	557		D	3	0	0	0	0
C	4	0	0	0	0		D	4	0	0	0	0
C	5	0	0	0	0		D	5	46	605	98	325
C	6	0	0	0	0		D	6	0	0	0	0
C	7	68	506	0	26		D	7	0	0	469	131
C	8	0	0	0	0		D	8	0	350	0	0
C	9	0	0	0	0		D	9	0	0	0	0
C	10	102	9	173	316		D	10	0	0	0	0
		On the nest standing							On the nest standing
Female	Session	Agonistic b.	Egg-care	Comfort b.			Female	Session	Agonistic b.	Egg-care	Comfort b.
C	1	0	0	0			D	1	6	49	5
C	2	0	67	0			D	2	4	49	169
C	3	0	35	0			D	3	0	0	0
C	4	0	0	0			D	4	0	0	0
C	5	0	137	4			D	5	0	0	0
C	6	0	0	0			D	6	0	0	0
C	7	0	0	0			D	7	0	0	0
C	8	0	67	0			D	8	0	0	0
C	9	0	44	0			D	9	0	0	0
C	10	0	61	0			D	10	0	0	0
		On the nest sitting								On the nest sitting
Female 1	Session	Agonistic b.	Incubation	Nest-building	Comfort b.	Sleeping		Female 2	Session	Agonistic b.	Incubation	Nest-building	Comfort b.	Sleeping
HRY red	01.04.2016	34	496	0	10	0		RHH green	1	75	525	0	0	0
HRY red	05.04.2016	27	11	304	36	0		RHH green	2	41	45	447	0	0
HRY red	18.03.2016	36	0	564	0	0		RHH green	3	78	0	487	0	0
HRY red	21.03.2016	0	0	0	0	0		RHH green	4	133	379	688	0	0
HRY red	22.03.2016	0	0	0	0	0		RHH green	5	150	705	204	0	0
HRY red	23.03.2016	123	436	41	0	0		RHH green	6	67	0	533	0	0
HRY red	24.03.2016	36	0	564	0	0		RHH green	7	282	0	318	0	0
HRY red	27.03.2016	0	564	25	11	0		RHH green	8	6	0	527	0	0
HRY red	29.03.2016	0	0	0	0	0		RHH green	9	92	224	840	0	0
HRY red	30.03.2016	38	0	562	0	0		RHH green	10	30	0	509	0	0
